# Supplementary material for: Using the site-knockout strategy to understand the low activity of the nitrate electro-reduction reaction on Pt(111)
Source: Royal Society of Chemistry journal article supplement (doi:10.1039/d2nj01773c), 2022-01-01
Supplement: d2nj01773c1.pdf [file d2nj01773c1.pdf]

## Supplementary Information Files

Using the site-knockout strategy to understand the low activity of  
nitrate electro-reduction reaction on Pt(111)

*Kaline Nascimento da Silva<sup>a,b</sup>, Gabriela Volpini Soffiati<sup>c</sup>, Edison Z. da Silva<sup>d</sup>, Miguel  
Angel San-Miguel<sup>c</sup> and Elton Sitta<sup>a,\*</sup>*

*a Chemistry Department, Federal University of Sao Carlos, Rod. Washington Luis, km  
235, Sao Carlos, Brazil. ZIP code 13565-905*

*b Department of Chemistry, University of Helsinki, A.I. Virtasen aukio  
1, 00560, Finland (present address)*

*c Institute of Chemistry, State University of Campinas, ZIP code 13083-970, Campinas,  
SP, Brazil*

*d Institute of Physics "Gleb Wataghin", State University of Campinas, 13083-859,  
Campinas - SP, Brazil*

*\*e-mail: [esitta@ufscar.br](mailto:esitta@ufscar.br)*

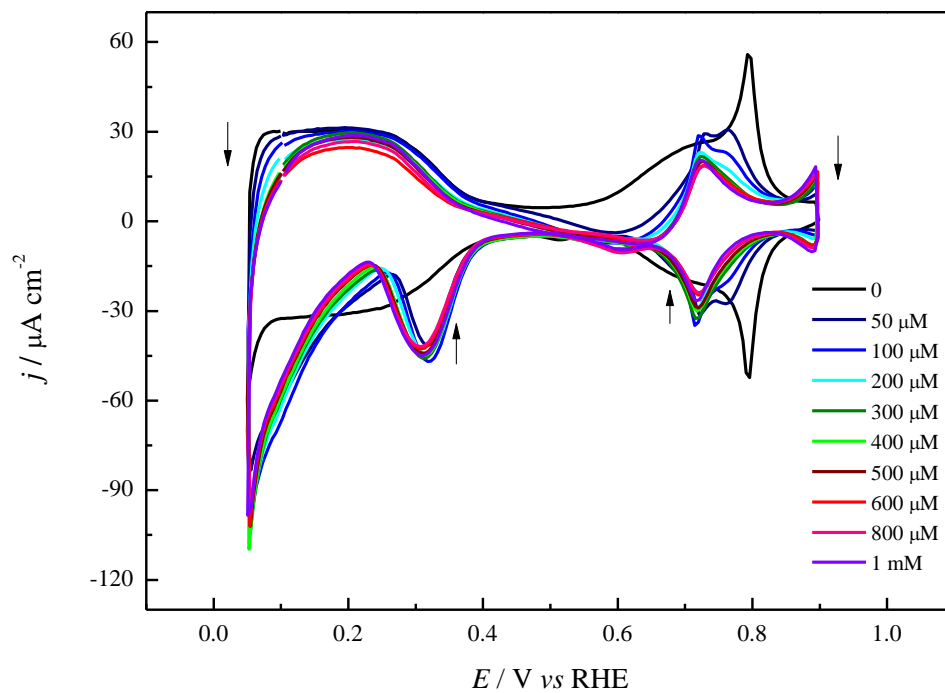

Figure S1: Pt(111) cyclic voltammograms in 0.1 M HClO<sub>4</sub> (black) with successive sodium nitrate additions.  $\nu = 50 \text{ mV s}^{-1}$

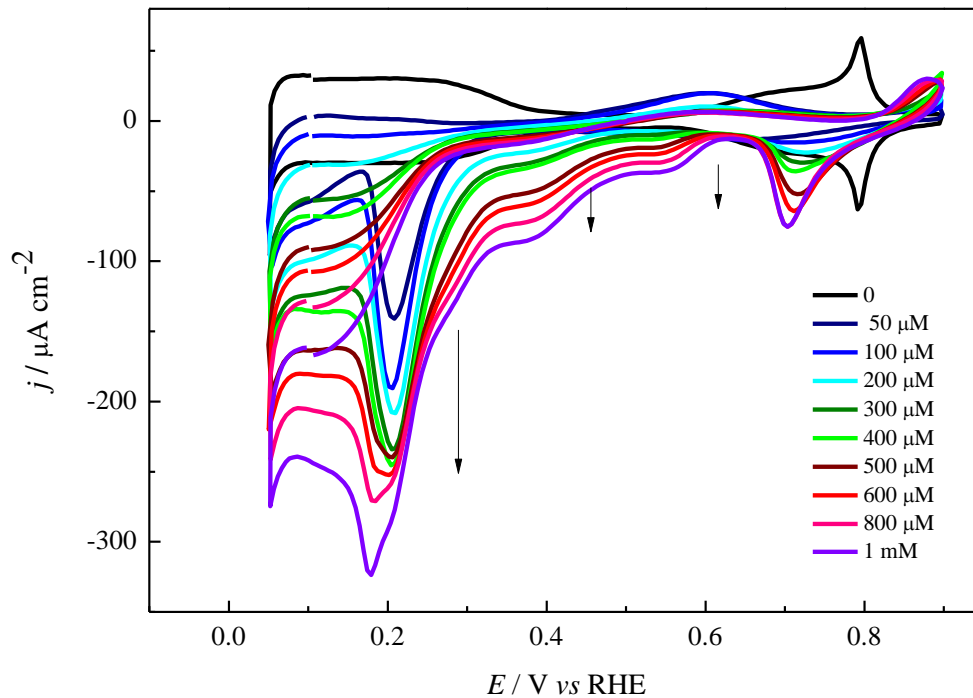

Figure S2: Pt(111) cyclic voltammograms in 0.1 M HClO<sub>4</sub> (black) with successive sodium nitrite additions.  $\nu = 50 \text{ mV s}^{-1}$

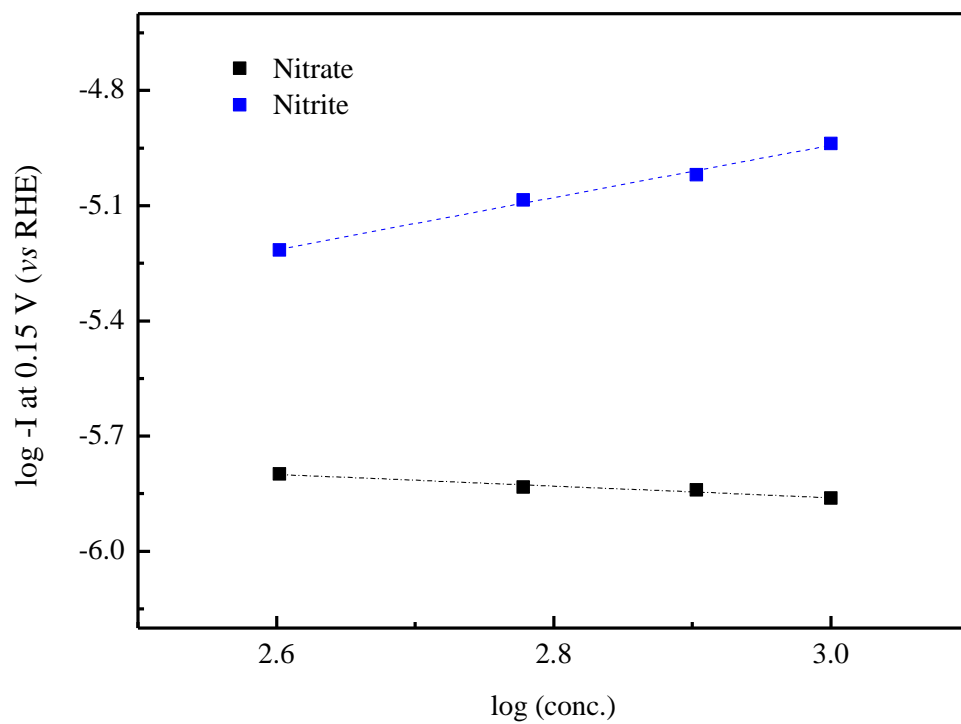

Figure S3: Reaction order determination graphic: Logarithmic function of the cathodic current at 0.15 V in function of logarithmic sodium nitrate (black) or sodium nitrite (blue) concentration in 0.1 M HClO<sub>4</sub> on Pt(111)
